# Supplementary material for: Molecular and functional characterization of plant growth-promoting bacterial endophytes from Curcuma longa rhizomes for microbiome-based agricultural solutions
Source: Research Square preprint supplement (doi:10.21203/rs.3.rs-8004788/v1), 2025-11-17

**Graphical abstract**

**Isolated bacterial endophyte**

**Molecular Identification**

(16S rDNA)

**Molecular and functional characterization of plant growth-promoting bacterial endophytes from *Curcuma longa* rhizomes for microbiome-based agricultural solutions**

**Functional**

**characterization**


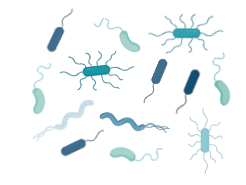

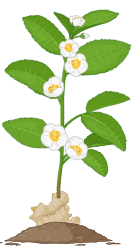

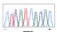

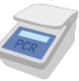

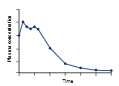


***Identified endophytes: Pseudomonas putida; Priestia megaterium;* *Brevundimonas bullata*; *Leucobacter aridicollis* and *Pseudomonas syringae***


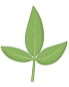

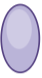

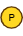

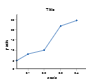

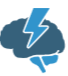


**Stress tolerance: acidity, salinity and Aluminum**

**Plant growth promoting: ACC, IAA, NH3**

**Enzyme production: catalase, cellulase, protease, gelatinase, amylase.**

**Phosphate solubilization**

**Biostimulating activities: Arginine and ornithine decarboxylase**

**Native microbiome-based agricultural solutions**

(Excluded: Pathogenic strain)


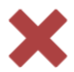

Supplement: Supplementary file 1 [file 720f992c57510b1af760daa7.docx]
